# Supplementary material
Source: PubMed Central journal article supplement (PMC524264)
Supplement: pnas_101_44_15688__1.pdf [file pnas_101_44_15688__1.pdf]

**Table 4. Case-control series characteristics**

|                       |                 | WashU  |         | UK    |         | UCSD   |         | Linkage |
|-----------------------|-----------------|--------|---------|-------|---------|--------|---------|---------|
|                       |                 | Case   | Control | Case  | Control | Case   | Control | Case    |
| Total subjects        | <i>n</i> = 2285 | 419    | 377     | 392   | 407     | 278    | 412     | 461     |
| Gender                | Female          | 265    | 237     | 301   | 303     | 126    | 262     | 336     |
|                       | Male            | 154    | 140     | 91    | 104     | 152    | 150     | 125     |
| Age (years)           | Mean            | 81.6   | 77.5    | 81.7  | 76.5    | 79.4   | 78.4    | 81.7    |
|                       | SD              | 6.6    | 7.5     | 6.6   | 6.3     | 6.4    | 7.7     | 7.1     |
|                       | Min - Max       | 66-101 | 65-104  | 63-97 | 61-95   | 64-102 | 61-104  | 63-103  |
|                       | Range           | 35     | 39      | 34    | 34      | 38     | 43      | 40      |
| Age of onset (years)  | Mean            | 76.2   | na      | 75.7  | na      | 72.2   | na      | 73.3    |
|                       | SD              | 6.8    | na      | 7.0   | na      | 6.2    | na      | 6.3     |
|                       | Min - Max       | 65-98  | na      | 60-92 | na      | 60-89  | na      | 60-93   |
|                       | Range           | 33.0   | na      | 32.0  | na      | 29.0   | na      | 33.0    |
| MMSE                  | Mean            | 18.8   | 28.7    | 10.9  | 29.0    | 12.5   | 29.3    | 12.4    |
|                       | SD              | 7.5    | 1.4     | 8.5   | 0.8     | 9.6    | 1.3     | 8.4     |
|                       | Min - Max       | 0-30   | 21-30   | 0-29  | 28-30   | 0-30   | 24-30   | 0-30    |
|                       | Range           | 30.0   | 9.0     | 29.0  | 2.0     | 30.0   | 6.0     | 30.0    |
| No. yrs education     | Mean            | 12.8   | 14.2    | 10.2  | 11.2    | na     | na      | 11.4    |
|                       | SD              | 3.6    | 3.4     | 2.5   | 2.9     | na     | na      | 3.3     |
|                       | Min - Max       | 3-21   | 6-25    | 0-23  | 6-28    | na     | na      | 3-21    |
|                       | Range           | 18.0   | 19.0    | 23.0  | 22.0    | na     | na      | 18.0    |
| ApoE allele frequency | ε2              | 0.03   | 0.08    | 0.05  | 0.09    | 0.03   | 0.08    | 0.02    |
|                       | ε3              | 0.62   | 0.79    | 0.57  | 0.76    | 0.57   | 0.78    | 0.54    |
|                       | ε4              | 0.33   | 0.12    | 0.36  | 0.13    | 0.38   | 0.13    | 0.44    |
|                       | Missing         | 0.01   | 0.02    | 0.02  | 0.02    | 0.01   | 0.01    | 0.00    |

Linkage cases: one randomly selected sibling per sibship
