# Supplementary material
Source: PubMed Central journal article supplement (PMC524264)
Supplement: pnas_101_44_15688__2.pdf [file pnas_101_44_15688__2.pdf]

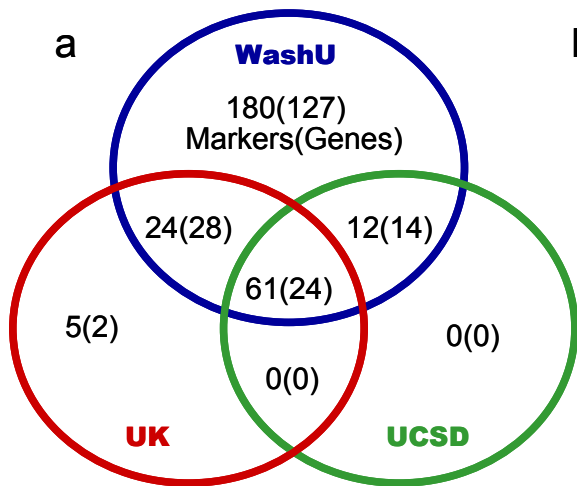

**b**

| SNP CLASS                         | COUNT |
|-----------------------------------|-------|
| Missense Mutation                 | 115   |
| Donor splice site                 | 1     |
| Transcription Factor Binding Site | 46    |
| Human-Mouse Syntenic region       | 23    |
| UTR3                              | 14    |
| UTR5                              | 6     |
| Silent Mutation                   | 2     |
| Intron                            | 69    |
| Intergenic/Unknown                | 6     |
| TOTAL                             | 282   |
