# Supplementary material
Source: PubMed Central journal article supplement (PMC524264)
Supplement: pnas_101_44_15688__3.pdf [file pnas_101_44_15688__3.pdf]

**Table 5. Power to replicate for Table 1 markers**

| Strata      | Gene      |         | Cs     | Co     |          |                  | Power     |
|-------------|-----------|---------|--------|--------|----------|------------------|-----------|
|             | SNP ID    |         | allele | allele | <i>P</i> | OR (95%CI)       | to        |
|             | Type/Pos. | Sample  | freq   | freq.  | value    |                  | replicate |
| All         |           | WashU   | 29.4   | 23.1   | 0.0041   | 1.38 (1.11:1.74) | n/c       |
| GAPD        |           | UCSD    | 27.5   | 22.9   | 0.027    | 1.27 (1.00:1.64) | 0.74      |
| rs3741916   |           | UK      | 28.1   | 30.9   | 0.89     | 0.87 (0.70:1.09) | 0.81      |
| UTR5/89.3   |           | W/UC/UK | 28.5   | 25.6   | 0.047    | 1.14 (1.00:1.30) | 1.00      |
|             |           | Linkage | 28.0   | 23.0   | 0.006    | 1.31 (1.06:1.61) | n/c       |
| rs1060621   |           | WashU   | 20.6   | 16.3   | 0.033    | 1.33 (1.02:1.74) | n/c       |
| Intron/90.0 |           | UCSD    | 21.6   | 17.6   | 0.036    | 1.28 (0.98:1.69) | 0.51      |
|             |           | UK      | 19.5   | 19.7   | 0.53     | 0.99 (0.77:1.27) | 0.59      |
|             |           | W/UC/UK | 20.5   | 17.9   | 0.030    | 1.18 (1.02:1.37) | 0.96      |
|             |           | Linkage | 19.0   | 16.6   | 0.027    | 1.24 (1.00:1.55) | n/c       |
| APOE4-      |           | WashU   | 27.7   | 37.5   | 0.0030   | 0.63 (0.47:0.86) | n/c       |
| PKP2P1      |           | UCSD    | 33.5   | 33.5   | 0.51     | 1.00 (0.70:1.43) | 0.69      |
| rs2008134   |           | UK      | 27.0   | 33.5   | 0.024    | 0.73 (0.54:1.00) | 0.84      |
| MS/33.8     |           | W/UC/UK | 28.8   | 34.8   | 0.0025   | 0.75 (0.63:0.91) | 1.00      |
|             |           | Linkage | 31.0   | 35.4   | 0.092    | 1.22 (0.91:1.65) | n/c       |
| CNAP1       |           | WashU   | 19.6   | 14.2   | 0.036    | 1.47 (1.02:2.12) | n/c       |
| rs2072373   |           | UCSD    | 21.5   | 15.7   | 0.029    | 1.47 (0.99:2.20) | 0.43      |
| Intron/77.2 |           | UK      | 18.1   | 18.9   | 0.61     | 0.95 (0.66:1.36) | 0.53      |
|             |           | W/UC/UK | 19.5   | 16.3   | 0.040    | 1.25 (1.01:1.55) | 0.93      |
| rs7311174   |           | WashU   | 24.5   | 34.6   | 0.002    | 0.61 (0.45:0.84) | n/c       |
| Intron/80.9 |           | UCSD    | 29.0   | 31.7   | 0.24     | 0.87 (0.62:1.25) | 0.77      |
|             |           | UK      | 23.3   | 29.0   | 0.034    | 0.74 (0.54:1.02) | 0.88      |
|             |           | W/UC/UK | 25.2   | 31.7   | 0.0008   | 0.72 (0.60:0.88) | 1.00      |
|             |           | Linkage | 28.4   | 33.1   | 0.074    | 1.24 (0.92:1.69) | n/c       |
| rs2072374   |           | WashU   | 24.7   | 34.6   | 0.0023   | 0.62 (0.46:0.84) | n/c       |
| Silent/83.2 |           | UCSD    | 28.8   | 31.8   | 0.21     | 0.86 (0.61:1.23) | 0.75      |
|             |           | UK      | 23.5   | 29.0   | 0.039    | 0.75 (0.54:1.03) | 0.86      |
|             |           | W/UC/UK | 25.2   | 31.7   | 0.0009   | 0.72 (0.60:0.88) | 1.00      |
| GAPD        |           | WashU   | 31.9   | 21.4   | 0.0003   | 1.72 (1.28:2.33) | n/c       |
| rs3741916   |           | UCSD    | 28.4   | 22.0   | 0.030    | 1.41 (0.98:2.02) | 0.84      |
| UTR5/89.3   |           | UK      | 28.0   | 30.6   | 0.79     | 0.88 (0.65:1.20) | 0.92      |
|             |           | W/UC/UK | 29.7   | 24.7   | 0.0084   | 1.27 (1.06:1.53) | 1.00      |
|             |           | Linkage | 27.7   | 21.7   | 0.042    | 1.38 (0.96:1.99) | n/c       |
| rs1060621   |           | WashU   | 20.6   | 14.8   | 0.028    | 1.49 (1.04:2.14) | n/c       |
| Intron/90.0 |           | UCSD    | 22.5   | 16.8   | 0.036    | 1.43 (0.97:2.13) | 0.46      |
|             |           | UK      | 17.3   | 19.1   | 0.75     | 0.88 (0.62:1.27) | 0.58      |
|             |           | W/UC/UK | 19.9   | 17.0   | 0.065    | 1.22 (0.99:1.51) | 0.95      |
|             |           | Linkage | 15.9   | 15.6   | 0.19     | 1.18 (0.81:1.72) | n/c       |

Power to replicate has not been calculated (n/c) for the sample set that was genotyped first and the Linkage sample.
