# Supplementary material
Source: PubMed Central journal article supplement (PMC524264)
Supplement: pnas_101_44_15688__5.pdf [file pnas_101_44_15688__5.pdf]

**Table 6. List of 63 markers in the linkage disequilibrium (LD) matrix**

| LD-Matrix Markers | Base pair position<br>(Celera Human<br>Genome Assembly,<br>Release R27) |
|-------------------|-------------------------------------------------------------------------|
| rs2240867         | 6606270                                                                 |
| rs7298053         | 6646806                                                                 |
| rs714774          | 6647033                                                                 |
| rs2079867         | 6649858                                                                 |
| hDV68530963       | 6651129                                                                 |
| hDV68531036       | 6651886                                                                 |
| hDV68531021       | 6652485                                                                 |
| rs2072373         | 6659637                                                                 |
| rs10849481        | 6661370                                                                 |
| rs7311174         | 6663316                                                                 |
| rs2072374         | 6665594                                                                 |
| rs10849484        | 6665690                                                                 |
| rs740851          | 6666099                                                                 |
| hDV61587757       | 6668192                                                                 |
| rs1060621         | 6672445                                                                 |
| rs1060620         | 6672471                                                                 |
| rs1065691         | 6674069                                                                 |
| rs1803621         | 6674858                                                                 |
| rs9634157         | 6675947                                                                 |
| rs1047792         | 6676848                                                                 |
| rs2240875         | 6677289                                                                 |
| rs7297364         | 6679191                                                                 |
| rs7296476         | 6679246                                                                 |
| hDV68530985       | 6688679                                                                 |
| rs6489722         | 6690083                                                                 |
| hDV68531032       | 6690411                                                                 |
| rs7298463         | 6691714                                                                 |
| hCV25605071       | 6703620                                                                 |
| rs740842          | 8038142                                                                 |
| rs4764497         | 8044762                                                                 |
| rs13306615        | 8081258                                                                 |
| hCV15757382       | 8111167                                                                 |
| rs758738          | 8171519                                                                 |
| rs2267966         | 8174083                                                                 |
| rs2041385         | 8179182                                                                 |
| rs2041386         | 8179427                                                                 |
| rs2532501         | 8179642                                                                 |
| rs1045546         | 8184796                                                                 |
| rs12964           | 8189080                                                                 |
| rs2534717         | 8190638                                                                 |
| rs2072375         | 8191933                                                                 |
| hCV2981216        | 8199167                                                                 |
| rs2532485         | 8199988                                                                 |
| rs2532484         | 8200292                                                                 |
| rs2532519         | 8203025                                                                 |
| rs2008134         | 8205334                                                                 |
| rs2532514         | 8205861                                                                 |
| rs2532513         | 8206060                                                                 |
| rs7307116         | 8217834                                                                 |
| rs4764600         | 8218896                                                                 |
| rs6489718         | 8221297                                                                 |
| rs11064237        | 8231017                                                                 |
| rs10774435        | 8232983                                                                 |
| rs3741916         | 8260852                                                                 |
| hCV25605185       | 8307771                                                                 |
| rs4376959         | 8358792                                                                 |
| rs1045553         | 8364270                                                                 |
| rs1882553         | 8364553                                                                 |
| rs4764616         | 8381809                                                                 |
| rs2178691         | 8454137                                                                 |
| rs2286731         | 8454867                                                                 |
| rs1882547         | 8456442                                                                 |
| rs2286730         | 8457137                                                                 |
