# Supplementary material
Source: PubMed Central journal article supplement (PMC524264)
Supplement: pnas_101_44_15688__6.pdf [file pnas_101_44_15688__6.pdf]

**Table 7. LD metrics of Table 1 markers**

|           | rs2008134 | rs2072373 | rs7311174 | rs2072374 | rs3741916 | rs1060621 |
|-----------|-----------|-----------|-----------|-----------|-----------|-----------|
| rs2008134 | 1         | 0.93      | 0.93      | 0.52      | 0.90      |           |
| rs2072373 | 0.10      | 1         | 1         | 0.91      | 0.99      |           |
| rs7311174 | 0.75      | 0.08      | 1         | 0.99      | 0.91      |           |
| rs2072374 | 0.75      | 0.08      | 1         | 0.99      | 0.91      |           |
| rs3741916 | 0.04      | 0.49      | 0.13      | 0.14      | 0.86      |           |
| rs1060621 | 0.08      | 0.90      | 0.07      | 0.07      | 0.48      |           |

D' values for *APOE4*-negative samples of the WashU series are shown in the upper triangle, the lower triangle represents the R<sup>2</sup> measure.
