# Supplementary material
Source: PubMed Central journal article supplement (PMC524264)
Supplement: pnas_101_44_15688__7.pdf [file pnas_101_44_15688__7.pdf]

**Table 8. Power to replicate for Table 2 markers**

| Strata | Gene       | Sample  | Cs allele freq | Co allele freq | <i>P</i> value | OR (95%CI)       | Power to replicate |
|--------|------------|---------|----------------|----------------|----------------|------------------|--------------------|
| All    |            | UK      | 34.8           | 42.1           | 0.0031         | 0.73 (0.60:0.90) | n/c                |
|        | GAPDS      | WashU   | 37.3           | 42.3           | 0.027          | 0.81 (0.66:1.00) | 0.82               |
|        | rs12984928 | UCSD    | 39.4           | 40.6           | 0.34           | 0.95 (0.75:1.20) | 0.73               |
|        | Intron     | W/UC/UK | 36.9           | 41.7           | 0.0016         | 0.81 (0.72:0.93) | 1.00               |
|        | rs4806173  | UK      | 34.8           | 41.9           | 0.0039         | 0.74 (0.60:0.91) | n/c                |
|        | TFBS       | WashU   | 36.9           | 42.4           | 0.016          | 0.79 (0.64:0.98) | 0.80               |
|        |            | UCSD    | 39.0           | 40.3           | 0.33           | 0.95 (0.75:1.20) | 0.70               |
|        |            | W/UC/UK | 36.6           | 41.5           | 0.0011         | 0.81 (0.72:0.92) | 1.00               |
| LT75   |            | UK      | 28.3           | 44.4           | 0.00002        | 0.49 (0.35:0.69) | n/c                |
|        | GAPDS      | WashU   | 34.3           | 40.7           | 0.048          | 0.76 (0.55:1.05) | 0.99               |
|        | rs12984928 | UCSD    | 36.7           | 39.5           | 0.25           | 0.88 (0.63:1.26) | 0.98               |
|        | Intron     | W/UC/UK | 33.1           | 41.7           | 0.00012        | 0.68 (0.57:0.83) | 1.00               |
|        | rs4806173  | UK      | 27.8           | 44.4           | 0.00001        | 0.48 (0.35:0.67) | n/c                |
|        | TFBS       | WashU   | 33.9           | 41.3           | 0.027          | 0.72 (0.53:1.01) | 0.99               |
|        |            | UCSD    | 36.1           | 39.8           | 0.19           | 0.85 (0.60:1.21) | 0.98               |
|        |            | W/UC/UK | 32.6           | 42.0           | 0.00003        | 0.66 (0.55:0.80) | 1.00               |
| GE75   |            | WashU   | 31.4           | 38.2           | 0.039          | 0.74 (0.56:0.99) | n/c                |
|        | p-GAPD     | UCSD    | 34.9           | 33.1           | 0.66           | 1.08 (0.74:1.59) | 0.33               |
|        | rs2029721  | UK      | 28.8           | 34.9           | 0.024          | 0.75 (0.57:1.00) | 0.59               |
|        | Missense   | W/UC/UK | 30.8           | 35.2           | 0.018          | 0.80 (0.68:0.97) | 0.93               |

Power to replicate has not been calculated (n/c) for the sample set that was genotyped first.
