# Supplementary material
Source: PubMed Central journal article supplement (PMC524264)
Supplement: pnas_101_44_15688__8.pdf [file pnas_101_44_15688__8.pdf]

hCV15757382 pos=8111167

TACATTTAGCTGAGACATAGGTGCCTAGAACGTGAGTGGAGCAGTAGAGCCTCAGGAGACGAGGCTCCACCCTCACCTC  
CGCTGCCTGTAGTGTGACCCTGGCCTTTCCTCGGTCTCTCTGGCCCCCATCATCTGCCAGTGGCCCTCCGGCTCCC  
TCTCAGTGAGGTAAGGAAAGAGGAGGCCAGTGGGGAGGGCCAGTCCCATCTCCTCCACGTGATGTCCAGGGTTTCCCA  
CGCTCGTCTCCAGCAGCCAGTTTTCTGGGGACAGTGCCACCTTCCCTCTGAGGCCGCGAG

R

GGGCTGGAGCCCCGTGACCCACTTCCGAGGCCAGGTTCTGTCCTGCCATTGCCTCTCACCTGGCGGGCAGCGGGAGCA  
GCAGATGCGGTGCTGGGCTCATAGTATTCTTTTTCTGGTCCCTGCAGGTCTGGTTCTCCGACGCATATGGAGGCACC  
TTCAAAGGGAGATGGAGAAGAGGAGAGAAGAATTAGTCAGGGGTCAGCTTGGGAGGGCAGAGGGAATGGAGCGACGGCT  
GCCCAGATCCCTCTTGGCCACCCCTGCCCCACTCTACCAGGCCCTTCCCTCACCGCCTGGGGC

hCV2981216 pos=8199167

CTTGAAGCCAGGAGTTCAAGACCAACCTGGCTAACGCAGCAAAATCCCGTCTCTACTAAAAATACAAAAATTAGCTGGG  
CATGGACGCCTGTAGTCCCAGCTACTCGGGAGACTGAGGCAGGAGGATCACTTGAACCCGGGAGGCGGAGGCTGCAGTA  
AGCCGAGATCTTGCCACTGCCTCAACCTGGGCAACAGAATGAGACTGTCTCAAAAAAAAAAAAAAAAAAGAAAGAAAG  
AAAGAAAAAGAAAAGAAAAAGAATGGGAGGAAATATTTCTGGCAGCATGAATGCCTATTTAT

Y

CCCACCAACTTTCCCTGAAAAAAAACTTAAAATCATTGAATGGTGACTCACGCCTATAATCCCAGCATTTTGGGAGGC  
CAAAGCAGGAGGATCACTTGAGCCCAGGAGTTCAAGACTAGCCTGGACAACATGGTGAAATCCTGTCTCTACAAGAAAT  
AGATACAAAAAATATAGCTGGGTATTTGTGGCACACACCTGTAGTTCCAACACTTGGGAGGCTGAGGTGGGAGGATTA  
CCTGAGCCTGAGGAGGTCAAGAAAGCAGTGAGCCATGATCACACCATTGCACTCCAACCTGGG

hdV68530963 pos=6651129

AGGTGCCAGGTGTTCAAAGTGCTGCAGCATCTGGATGATCTTCACTGTAGCACCTGTGGAAGCATTAAACATGAGAAAT  
TATGGGCAATACAAAAAGGCGGGCAAAGCGACTGGTAACTTACTGAGCATATGGTTATAACGGGTCAAGGCTACACC  
AAGCAGGTGTGTTATGGCTTCCCGAGTGGGGCGGTCTTCTGGTGATTAATGGTGGGATTCTCCAGAAGGCGGTAGCAA  
CAGCCAGTAACCAAACCTGAGAAAGGAAGAGTTGAGATGATGAAAGCAGCTGTCTGGATCCAA

Y

TGTATCAGAGCCCTGCCTCATTCTATCCCTACTGCTCCCAAAGTCAGGGTTTTCTTTATTCTAGCCATTACTTTTC  
TATAACAAGTTGCTTTGCTTTGCTGACCCCAGTTAGGTACTCCTTCCCTCAAGATTACCAAACCTTCAACCAGTTGTGAT  
GCTGACAAAGAACCTAAATATATCATAAAAATATGATAGAGTTGGCCGGGTGTGGTGGCTCATGCCTGTAATCCCAGCA  
CTTTGGGAGGCCGAGGCAGGTGGATCACGAGGTGAGGCATTCAAGACCAGCTTGGCCAACATA

hdV68531036 pos=6651886

GATCAAGGCTGCAATGAGCTATGATCATGCTCCAGCATGGGTGACAGAGCCAGATCCTACCTCCAAGAAAAAAAAAAAA

TCAAAGCTGAGTTGCTCTTACTAGACTTAAGCTGCAGAAATGTCATCTCCCTTACCAGAAGCTGGATAAAAAGCAATGTGA  
ATTGAAAAGATTAACAGATTAATAAAGAGCTCCTTATTCAACAAACTTGACCTGCTTCTCTACAGAAAAGGAAATGTCACA  
ATGATAAATCTAGACAACCTTGTCAAAGCTACTTTCTTGTCTGTAAAGAAACAGCCTTTCAAC

R

CTGGACTTAAAATCCCCAGAAAAGCTCAGTGACCCCTAGTGGACCACCTACTTCTCCATCCAGGTGATCTAGCAAAAT  
GCACATGCTGGACATCAGGATAGCTGGGACACGTTCTGCTAGTTCTGTGAGGAATGCTGCAAAGCCCTTTGTCCCTGAA  
GGTCTCGACTCAGCTCTTGGGGACACTTTTGTCCAATCTCTCTACACAGGGAAGAAAACACAGCCATAGCAACATAGA  
TCAATTATTAGTTCCAGTAAGGGAAGGTAAGACAGGTATCTAATATCTGAAGGAATCTACT

hDV68531021 pos=6652485

TTTCCCTCCACTCTCCTTCAGATGCTTTACTGACAGAAAATGAGACAGAAACATGGAAATCAGCCTTAAGAGTGCCAG  
CAAGTCCAATACATAATCTAGTGGAGAGCAGGGTTAAGGTTTTGCCAGGCTAAGAACCAGAGAATAGGGTCTTGACAAA  
AAAGTTAAAGTAAATGAGATGAACAAGTGGACTGTCTTTGTCCCTTGACATTCACCTAGGAGTGCCCAACATCAGTATGG  
GAATCAGCCAGGTTAGCATTACAGGCATAAAAGAGAATTGAGAGAGATGACATGGGTTGATTTG

R

GAAAGTTCATTGTTTGAGGAAGCAAGGCAAGCCAGCTGGTGGGAAGACGCTTTATCCTGAGGAACAGATGGGACTCAGA  
ATCAAAGCTGAAGGTAAGCATGGTAGCGCCTGCAATCCAGCACTTTGGGAGGCTGAGGCAGGAGGGTTGCTTGAGAC  
CAGGAGTTTGGAGACTAGCCTGGGCAATATGGCAAGACCCACCTCTACAAAACTAAAAAATTAGCCAGGCATGGTAG  
TATGTGCCTGAAGTCCCAGCTACTTGGGAGGCTGAGGTGGGAGGATTGCTTGAGCCAGGAGA

hDV61587757 pos=6668192

CGCCTTGGTATCGCAAAGTGTGGGATTACAGGCGTGAGCCACAGTGCCCGGCCTTTTTTTTTTTTTTAAAAAAGAGAC  
AGACAAATATTTTACAAGGGAAACAGAATTCGAATTCAGGTACCCTACAGGATACCCTGCACAGGGAGGACAGGAAC  
AGACTTCCTAGGATCTGTGCCTGCGAGCCGATGCTCTGAGAATGGGAGTTGTTTTCTTGGGTGTCTCGTCTTCTGTCA  
CTCTGTGAAAGATCTATGCAAAGAATTAAGGAATAAGAAAAGCTGAGTCACAAAAGATGTT

R

AAAAATAGATATCAGAGAACAAGTGAACAATCCACACCGCACAGAAGAAATAAAATCCAAGCTGTACAGGAGAGGC  
CCTTCTGCGGCAGTGGGGCAGAGCATCTACACTCAGGCCCGCAGCAGGTCCATGGAAACCAGCCCTCTGCACCCTA  
GCTGTGTGCCTTCTCGGCCGGAACAGGCGGGAGCATCATACTTCCCTCACTGGACTCATCACTTGAGAAGACAACCTT  
GGGTTTCTTTTTGGAAGCTCGCTGCTGGGTGTTTTGGATGCCGACGGGTAGTACGGCGGGGCTC

hDV68530985 pos=6688679

TCTCGGGTTGACAGAAGTGATGAGCTCACAGGAACAGGATTTGAGATGTGCTGCTACGCCAGCTAGACTGCAGGGCCCT  
GGAATGCCGGGCGGGTCTTAAGCAGCAGGTTGCCCTGGCTTCCATCTCTGTGATGGAATAGAATATGCACTGCCTGCCA  
TGGCTGATGAGACATGACAAAGCTGGCTCTGGGAAGCATGCCCTACCTAGGACCTGCCCTGTGGCCAGGGTGTCTGTC  
CGGCCCACTTGCAGTCTTAATCTCTGAATTCTGGGCCCTGGAACAGGCTGTGTCTAGTTCTCA

Y

TTGCCGTACTCACGGGCCCTTTACATACTCTACTTTCTCTTTCCCTCTGGGTTTGGAGTGCTAGTAACCCAGGCTCG

TGTGTCCACTGCTGTCATGCTGCTGTGGGACTTCCGGCCTCTGAGCCAGTCTGGTCACCTCTCTGTGACTCCCTTAGAG  
GAGGCTCTGGGTGGGTAGTTTTCTGGAGCTAGTGGGGAAGGACTTTGAGTGTCTCTACCAGGCTCTTGACCCACTCTGT  
TGATACTATGTGTCCTGCAGATGCTTTTACAGGGTTAAATGATACCACAAGAGGCAGGGCA

hdV68531032 pos=6690411

TACAGACCCTTACTTAAAATATTGAGACAGGGACTTGCTCTGTATCCGGGCTGGAGTGCAGTAGCGTCATCACAGCT  
CACTGCAGCCTCATCCTCCTGGGCTCAAGCAATCATCCTGCCTCAGCCTCTTGAGTAGCTGGGACTACAGGTGTGCACT  
ACCATGTCCATGCCTGGCTATTTTTTTTTTTTCTTTTTGCGTTGTCCAGGCCAGTCTCAAACCTCTGACCTGATCAGCA  
GGCTTTCTGAGCTTGAGTCTCTGCTCGTGCTGGCTTCTTAGTTGTGGTCCATGTTATGTGT

Y

CTTGGGAGTTTCAGTTGTCTGAAATCATCGTTCTGCCACCCAGAACCAGCCTGCTCTGCCCTGCAGGAGTTAACTAC  
GCGCTCAGCAGTGGCACAGGCACAGTTCTGGAATACATCCATAACCACAGGAACAACCTGCTGTTCTCAGGAGCATTTTT  
TTTTTAACTGAAGGAGCGTTTGTCTTGGTCCAGCTGTCCAGGACAGGAAGGAGTTATTCCTTGGGGACTGATTAGCT  
CATCGCTCTGCAGCACGCTGCTGTGTAGAGAGCCTTAGCTGGATTCCGGATGGTGCCTGATACT

hCV25605071 pos=6703620

TGAACTCCATTTCAAAAAAAAAAAGAACTTGATACAGTTATTAATAATAACAGGGCTGAGATTTAAATGGACTC  
CTTTAATTAGTGTACTAATTCTCTTACCATGTTTATTTCCGTTCCATTTATTTTAAATGTCCCTGTAACCTGTTCT  
GCCTCGTTTTTCTTTTTTAAACAGTAAGTGACGAAAATTCCAAGAGGCTGTCTAGTCGTGCTCGAAAGAGGTAAGTGTG  
GGTGTCAAACTTAAGTAGGTTAAATGGTACTGCTCATCTTTGACCACAGAGTTAATTCTAG

R

CTCTCACATTTCCCTATGGTGGAAATGGCAGAGCCTGGAAGTATCTTCCATTTCTTCACTCCTGAAATCTCTTGTGTC  
TTTTCAGGGCAGCCAAGAGGAGATTGGGCTCTGTTGAAGCCCCAAGACAAATAAGTCTCTGAGGCCAAACCATTGCC  
TGAAAAGCTACAAAAGGTCCGTGAACTAAGAGCTGGATGCTACATGAGGAGTCCCTTTGGGTCTGGGTAGGGAAGA  
ACTCGCTAAACATTTCCGAGTGAAAGGAACAGCCAAAGGACATTTCTGAGGGGTAGAAAGTAC

hCV25605185 Chr\_pos=8307771

GGTCATTTCTTCCAGTTTGTCTCATCTTAAATTGTCTCTCGTGCCTTAAGAGCCAGCCCTATCTTAGGACGGCCC  
TCCTAAACTGAGAGGGAATTGCTGTGTGCTGCCAGACTACCCTGTTAGAACTGAGCACAGGGGAGCAGAAAAATAGG  
CCAGGACAAAAGAGAGGGACAGAAAATGATAGGACAGGCAGACTTACCAGCAGGTGGGACAGGTGCAGGAGTGTGGG  
CTGCGTGTCCCTGGAGTGGAGGGTGTAGGAGTTTTTGGGGAGGGTGACCCTGGCTGGGACAT

Y

TTCTTGTTTTCTCCACCTCAGCCAGTTCAGGCATGCTCCAGCGCCATTAACATGTTCAAACCTCTGAACCTGTAGCA  
ATGGGACAAGAAGTTGAAGACCCAATTCCAGCTACAGGCTCCTTTCTATTGGCCTTCCAGTCTCCGCCTCCCGGGTTC  
AAGCAATTCTCTGCCTCAGCCTTCTGAGTAGCTGGGAATACAGGTGCCCGCCACCAGTGCAGCTAATTTTTGTATTT  
TTAGTAGAGATGGGTTTCGCCATGTTGACCAGGCTAGTCTCTAACTCCTGACCTCAAGTGAT
