# Supplementary material
Source: PubMed Central journal article supplement (PMC524264)

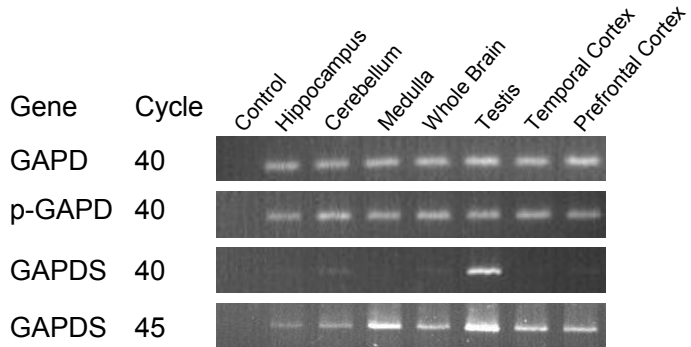

Supplement: pnas_101_44_15688__4.pdf [file pnas_101_44_15688__4.pdf]
